# Supplementary material for: Outer membrane-anchoring enables LpoB to regulate peptidoglycan synthesis rate
Source: PubMed Central journal article supplement (PMC9593243; doi:10.1016/j.tcsw.2022.100086), 2022-10-20
Supplement: mmc1.pdf [file mmc1.pdf]

## Supplementary Information

### Outer membrane-anchoring enables LpoB to regulate peptidoglycan synthesis rate

Ali A. Kermani<sup>1^#\*</sup>, Jacob Biboy<sup>1#</sup>, Daniela Vollmer<sup>1</sup> and Waldemar Vollmer<sup>1\*</sup>

<sup>1</sup> Centre for Bacterial Cell Biology, Biosciences Institute, Newcastle University, Richardson Road, Newcastle upon Tyne, NE2 4AX, UK.

<sup>^</sup> Present address: Department of Structural Biology, St. Jude Children's Research Hospital, Memphis, TN, 38105, United States

<sup>#</sup> Contributed equally.

<sup>\*</sup> Corresponding authors: Ali A. Kermani, Email: [akermani@stjude.org](mailto:akermani@stjude.org); Waldemar Vollmer,

Email: [w.vollmer@ncl.ac.uk](mailto:w.vollmer@ncl.ac.uk)

## Supplementary Information

**Supplementary Table 1:** Muropeptide composition of strains after osmotic upshift.

**Supplementary Table 2:** Muropeptide composition of newly synthesized PG after osmotic upshift with NaCl.

**Supplementary Table 3:** Muropeptide composition of newly synthesized PG after osmotic upshift with sucrose.

**Supplementary Figure 1:** PG composition of  $\Delta$ PBP1A and LpoB(CM) $\Delta$ PBP1A cells.

**Supplementary Table 1.** Muropeptide composition of strains after osmotic upshift.

| Muropeptide or feature <sup>1</sup> | Relative peak area (%) |                |            |                         |            |
|-------------------------------------|------------------------|----------------|------------|-------------------------|------------|
|                                     | BW25113 <sup>2</sup>   | $\Delta$ PBP1A |            | LpoB(CM) $\Delta$ PBP1A |            |
|                                     |                        | no NaCl        | 0.2 M NaCl | no NaCl                 | 0.2 M NaCl |
| Tri                                 | 5.3                    | 7.0            | 5.3        | 6.2                     | 4.5        |
| TetraGly <sup>4</sup>               | 1.4                    | 2.2            | 1.7        | 3.2                     | 2.5        |
| Tetra                               | 40.9                   | 38.1           | 38.5       | 42.7                    | 42.7       |
| Di                                  | 1.3                    | 1.9            | 1.3        | 1.3                     | 0.7        |
| Tri-LysArg                          | 3.3                    | 3.0            | 3.8        | 2.4                     | 2.7        |
| TetraTri(Dap)                       | 2.0                    | 1.6            | 2.9        | 4.2                     | 9.5        |
| TetraTetraGly <sup>4</sup>          | 1.7                    | 1.8            | 1.8        | 2.2                     | 1.7        |
| TetraTri                            | 1.8                    | 1.5            | 1.4        | 1.8                     | 1.3        |
| TetraTetra                          | 33.4                   | 31.0           | 31.2       | 28.3                    | 27.0       |
| TetraPenta                          | 1.0                    | 0.7            | 0.8        | 0.5                     | 0.6        |
| TetraTetraTri                       | 1.7                    | 0.9            | 1.4        | 0.5                     | 0.7        |
| TetraTri-LysArg                     | 0.0                    | 2.6            | 2.3        | 1.5                     | 1.2        |
| TetraTetraTetra                     | 3.1                    | 2.4            | 2.6        | 1.6                     | 1.8        |
| TetraTriAnh                         | 0.0                    | 2.6            | 1.6        | 1.2                     | 0.6        |
| TeraTetraAnh I                      | 1.3                    | 0.7            | 0.9        | 0.7                     | 0.9        |
| TeraTetraAnh II                     | 0.9                    | 1.0            | 1.0        | 1.0                     | 0.8        |
| TetraTetraTetraAnh                  | 0.9                    | 1.3            | 1.5        | 0.6                     | 0.7        |
| Monomers (total)                    | 52.3                   | 52.1           | 50.7       | 55.9                    | 53.2       |
| Dimers (total)                      | 42.0                   | 43.3           | 43.8       | 41.4                    | 43.6       |
| Trimers (total)                     | 5.7                    | 4.6            | 5.5        | 2.8                     | 3.1        |
| Dipeptides (total)                  | 1.3                    | 1.9            | 1.3        | 1.3                     | 0.7        |
| Tripeptides (total)                 | 7.1                    | 8.2            | 6.8        | 7.4                     | 5.5        |
| Tetrapeptides (total)               | 82.8                   | 79.6           | 80.3       | 83.0                    | 82.6       |
| Pentapeptides (total)               | 0.5                    | 0.3            | 0.4        | 0.2                     | 0.3        |
| Chain ends (%)                      | 1.4                    | 1.3            | 1.5        | 1.1                     | 1.1        |
| Av. glycan length (DS) <sup>2</sup> | 72                     | 77             | 68         | 93                      | 93         |
| LD-crosslinks (%)                   | 1.00                   | 0.79           | 1.46       | 2.09                    | 4.75       |
| DD-crosslinks (%)                   | 23.8                   | 23.9           | 24.1       | 20.5                    | 19.2       |
| Degree of cross-linkage             | 24.8                   | 24.7           | 25.6       | 22.5                    | 23.9       |
| Peptides in cross-links             | 47.7                   | 47.9           | 49.3       | 44.1                    | 46.8       |

Muropeptide names according to Glauner, 1988.

<sup>2</sup> The parental strain BW25113 was grown in standard LB medium.

<sup>3</sup> Average glycan chain length in disaccharide (DS) units was calculated from the percentage of anhydroMurNAc containing muropeptides.

**Supplementary Table 2.** Muropeptide composition of newly synthesized PG after osmotic upshift with NaCl.

| Muropeptide or feature <sup>1</sup> | Relative peak area (%) <sup>2</sup> |            |                 |             |
|-------------------------------------|-------------------------------------|------------|-----------------|-------------|
|                                     | ΔPBP1A                              |            | LpoB(CM) ΔPBP1A |             |
|                                     | no NaCl                             | 0.2 M NaCl | no NaCl         | 0.2 M NaCl  |
| Tri                                 | 2.2 ± 0.6                           | 2.0 ± 1.4  | 2.9 ± 0.5       | 1.1 ± 0.5   |
| TetraGly <sup>4</sup>               | 1.3 ± 0.3                           | 1.3 ± 0.0  | 1.9 ± 0.1       | 1.3 ± 0.5   |
| Tetra                               | 51.4 ± 2.6                          | 50.8 ±     | 53.7 ±          | 40.8 ± 17.7 |
| Di                                  | 1.3 ± 1.4                           | 1.7 ± 1.3  | 1.4 ± 0.3       | 1.4 ± 0.7   |
| Penta                               | 3.1 ± 1.2                           | 2.6 ± 1.1  | 2.4 ± 0.6       | 3.6 ± 2.5   |
| TetraTri(Dap)                       | 1.7 ± 0.5                           | 1.7 ± 0.8  | 3.5 ± 0.9       | 4.4 ± 0.6   |
| TetraTetraGly <sup>4</sup>          | n.d.                                | 0.3 ± 0.6  | n.d.            | 0.5 ± 0.8   |
| TetraTri                            | 2.0 ± 0.2                           | 1.9 ± 0.6  | 3.2 ± 0.6       | 0.9 ± 1.0   |
| TetraTetra                          | 30.3 ± 2.8                          | 31.2 ± 8.7 | 26.6 ±          | 39.3 ± 13.4 |
| TetraPenta                          | 1.4 ± 1.5                           | 1.2 ± 0.3  | 0.6 ± 0.6       | 2.0 ± 1.3   |
| TetraTetraTri                       | 0.3 ± 0.5                           | n.d.       | n.d.            | 0.6 ± 1.0   |
| TetraTetraTetra                     | 2.6 ± 0.5                           | 2.4 ± 0.5  | 1.7 ± 0.1       | 2.1 ± 1.2   |
| TetraTriAnh                         | 0.2 ± 0.4                           | 0.2 ± 0.4  | 0.3 ± 0.4       | 0.4 ± 0.7   |
| TeraTetraAnh I                      | 0.5 ± 0.4                           | 1.0 ± 0.3  | 1.1 ± 0.4       | 1.0 ± 0.1   |
| TeraTetraAnh II                     | 0.6 ± 0.5                           | 0.5 ± 0.5  | 0.7 ± 0.6       | 0.6 ± 0.5   |
| TetraTetraTri Anh                   | n.d.                                | n.d.       | n.d.            | n.d.        |
| TetraTetraTetra Anh                 | 1.2 ± 1.3                           | 1.2 ± 1.2  | 0.2 ± 0.4       | 0.3 ± 0.5   |
| Monomers (total)                    | 59.3 ± 2.6                          | 58.4 ± 9.7 | 62.2 ±          | 48.1 ± 14.1 |
| Dimers (total)                      | 36.6 ± 2.6                          | 38.0 ± 8.0 | 35.9 ±          | 48.9 ± 12.4 |
| Trimers (total)                     | 4.1 ± 1.5                           | 3.6 ± 1.7  | 1.9 ± 0.4       | 2.9 ± 2.1   |
| Dipeptides (total)                  | 1.3 ± 1.4                           | 1.7 ± 1.3  | 1.4 ± 0.3       | 1.4 ± 0.7   |
| Tripeptides (total)                 | 4.2 ± 0.4                           | 3.9 ± 1.0  | 6.3 ± 0.3       | 4.1 ± 0.1   |
| Tetrapeptides (total)               | 89.9 ± 1.3                          | 90.7 ± 2.8 | 88.3 ±          | 88.1 ± 3.3  |
| Pentapeptides (total)               | 2.4 ± 1.2                           | 3.2 ± 1.0  | 2.7 ± 0.9       | 1.0 ± 0.6   |
| Chain ends (anhydro)                | 1.0 ± 0.5                           | 1.3 ± 0.4  | 1.1 ± 0.5       | 1.1 ± 0.5   |
| Av. glycan length (DS) <sup>2</sup> | 112 ± 49                            | 87 ± 35    | 106 ± 48        | 109 ± 62    |
| LD crosslinks                       | 0.8 ± 0.3                           | 0.9 ± 0.4  | 1.7 ± 0.5       | 2.2 ± 0.3   |
| DD crosslinks                       | 20.2 ± 1.3                          | 20.4 ± 5.3 | 17.5 ±          | 24.2 ± 7.6  |
| Degree of cross-linkage             | 21.0 ± 1.4                          | 21.4 ± 5.1 | 19.2 ±          | 26.4 ± 7.3  |
| % Peptides in cross-links           | 40.7 ± 2.6                          | 41.6 ± 9.7 | 37.8 ±          | 51.9 ± 14.1 |

<sup>1</sup> Muropeptide names according to Glauner, 1988.

<sup>2</sup> Values are mean ± SD of 3 PG preparations, n.d., not detected.

<sup>3</sup> Average glycan chain length in disaccharide (DS) units was calculated from the percentage of anhydroMurNAc containing muropeptides.

**Supplementary Table 3.** Muropeptide composition of newly synthesized PG after osmotic upshift with sucrose.

| Muropeptide <sup>1</sup> or feature | Relative peak area (%) <sup>2</sup> |               |               |                 |               |               |
|-------------------------------------|-------------------------------------|---------------|---------------|-----------------|---------------|---------------|
|                                     | ΔPBP1A                              |               |               | LpoB(CM) ΔPBP1A |               |               |
|                                     | no sucrose                          | 0.2 M sucrose | 0.4 M sucrose | no sucrose      | 0.2 M sucrose | 0.4 M sucrose |
| Tri                                 | 2.4 ± 0.5                           | 3.1 ± 0.3     | 3.0 ± 0.3     | 2.2 ± 0.5       | 4.2 ± 1.0     | 5.0 ± 0.2     |
| TetraGly <sup>4</sup>               | 1.3 ± 0.1                           | 1.3 ± 0.1     | 1.3 ± 0.4     | 1.7 ± 0.3       | 1.8 ± 0.3     | 1.9 ± 0.5     |
| Tetra                               | 48.6 ± 4.0                          | 51.8 ± 4.2    | 50.6 ± 2.6    | 53.1 ± 3.3      | 48.5 ± 1.9    | 48.1 ± 0.8    |
| Di                                  | 1.3 ± 0.2                           | 1.1 ± 0.3     | 0.3 ± 0.3     | 0.8 ± 0.4       | 0.6 ± 0.1     | 0.7 ± 1.2     |
| Penta                               | 2.4 ± 1.6                           | 1.1 ± 0.2     | 3.0 ± 0.2     | 1.8 ± 1.0       | 1.0 ± 0.9     | 3.6 ± 0.3     |
| TetraTri(Dap)                       | 1.7 ± 1.0                           | 2.0 ± 1.0     | 2.9 ± 1.0     | 2.2 ± 0.7       | 3.7 ± 1.3     | 5.4 ± 1.0     |
| TetraTetraGly <sup>4</sup>          | n.d.                                | 0.3 ± 0.5     | 0.1 ± 0.3     | n.d.            | 0.6 ± 0.5     | 0.8 ± 0.8     |
| TetraTri                            | 1.5 ± 0.8                           | 1.5 ± 0.7     | 1.9 ± 0.5     | 2.1 ± 0.4       | 1.3 ± 0.8     | 2.0 ± 0.7     |
| TetraTetra                          | 34.7 ± 1.8                          | 32.9 ± 2.8    | 30.7 ± 1.3    | 31.8 ± 2.9      | 33.3 ± 3.2    | 26.1 ± 3.7    |
| TetraPenta                          | 0.5 ± 0.5                           | 0.6 ± 0.6     | 0.9 ± 0.4     | 0.6 ± 0.4       | 0.4 ± 0.3     | 0.9 ± 0.3     |
| TetraTetraTri                       | 0.7 ± 0.2                           | 0.2 ± 0.4     | 0.7 ± 0.6     | 0.4 ± 0.3       | 0.4 ± 0.3     | 0.5 ± 0.5     |
| TetraTetraTetra                     | 2.2 ± 0.9                           | 2.1 ± 0.1     | 1.8 ± 0.7     | 1.5 ± 0.5       | 1.9 ± 0.1     | 1.4 ± 0.4     |
| TetraTriAnh I                       | 0.7 ± 1.1                           | 0.4 ± 0.4     | 0.7 ± 1.1     | 0.3 ± 0.5       | 0.2 ± 0.3     | 0.8 ± 0.5     |
| TeraTetraAnh I                      | 0.7 ± 0.2                           | 1.1 ± 0.4     | 0.6 ± 0.6     | 0.6 ± 0.3       | 1.2 ± 0.2     | 0.9 ± 0.3     |
| TeraTetraAnh II                     | 0.7 ± 0.4                           | 0.4 ± 0.4     | 0.6 ± 0.5     | 0.6 ± 0.3       | 0.5 ± 0.5     | 1.2 ± 0.6     |
| TeraTetraTri Anh                    | 0.2 ± 0.4                           | n.d.          | 0.2 ± 0.4     | n.d.            | n.d.          | 0.3 ± 0.4     |
| TetraTetraTetra Anh                 | 0.3 ± 0.3                           | 0.2 ± 0.3     | 0.6 ± 0.6     | 0.3 ± 0.4       | 0.4 ± 0.4     | 0.5 ± 0.9     |
| Monomers (total)                    | 56.0 ± 2.2                          | 58.3 ± 4.3    | 58.3 ± 2.6    | 59.5 ± 3.1      | 56.1 ± 3.1    | 59.2 ± 1.8    |
| Dimers (total)                      | 40.6 ± 2.3                          | 39.3 ± 3.9    | 38.4 ± 2.1    | 38.2 ± 3.0      | 41.3 ± 2.4    | 38.1 ± 2.4    |
| Trimers (Total)                     | 3.4 ± 0.7                           | 2.5 ± 0.4     | 3.3 ± 0.6     | 2.3 ± 0.4       | 2.6 ± 0.8     | 2.7 ± 1.1     |
| Dipeptides (total)                  | 1.3 ± 0.2                           | 1.1 ± 0.3     | 0.3 ± 0.3     | 0.8 ± 0.4       | 0.6 ± 0.1     | 0.7 ± 1.2     |
| Tripeptides (total)                 | 4.7 ± 1.4                           | 5.1 ± 0.5     | 6.0 ± 0.8     | 4.6 ± 1.1       | 6.9 ± 1.6     | 9.3 ± 0.8     |
| Tetrapeptides (total)               | 90.5 ± 3.8                          | 91.7 ± 1.0    | 88.7 ± 1.7    | 91.5 ± 2.8      | 89.9 ± 2.8    | 83.3 ± 2.2    |
| Pentapeptides (total)               | 2.7 ± 1.8                           | 1.4 ± 0.3     | 3.5 ± 0.4     | 2.1 ± 1.2       | 1.2 ± 0.8     | 4.0 ± 0.2     |
| Chain ends (anhydro)                | 1.2 ± 0.5                           | 1.0 ± 0.3     | 1.2 ± 0.4     | 0.9 ± 0.1       | 1.1 ± 0.3     | 1.7 ± 0.4     |
| Av. glycan length (DS) <sup>3</sup> | 91 ± 30                             | 104 ± 36      | 92 ± 39       | 117 ± 13        | 97 ± 33       | 60 ± 16       |
| LD crosslinks                       | 0.8 ± 0.5                           | 1.0 ± 0.5     | 1.4 ± 0.5     | 1.1 ± 0.4       | 1.9 ± 0.7     | 2.7 ± 0.5     |
| DD crosslinks                       | 21.8 ± 0.8                          | 20.3 ± 2.0    | 20.0 ± 0.9    | 19.5 ± 1.4      | 20.5 ± 2.3    | 18.2 ± 1.3    |
| Degree of cross-linkage             | 22.6 ± 1.1                          | 21.3 ± 2.2    | 21.4 ± 1.4    | 20.6 ± 1.6      | 22.4 ± 1.6    | 20.9 ± 0.8    |
| % Peptides in cross-links           | 44.0 ± 2.2                          | 41.7 ± 4.3    | 41.7 ± 2.6    | 40.5 ± 3.1      | 43.9 ± 3.1    | 40.8 ± 1.8    |

<sup>1</sup> Muropeptide names according to Glauner, 1988.

<sup>2</sup> Values are mean ± SD of 3 PG preparations; n.d., not detected.

<sup>3</sup> Average glycan chain length in disaccharide (DS) units was calculated from the percentage of anhydroMurNAc containing muropeptides.

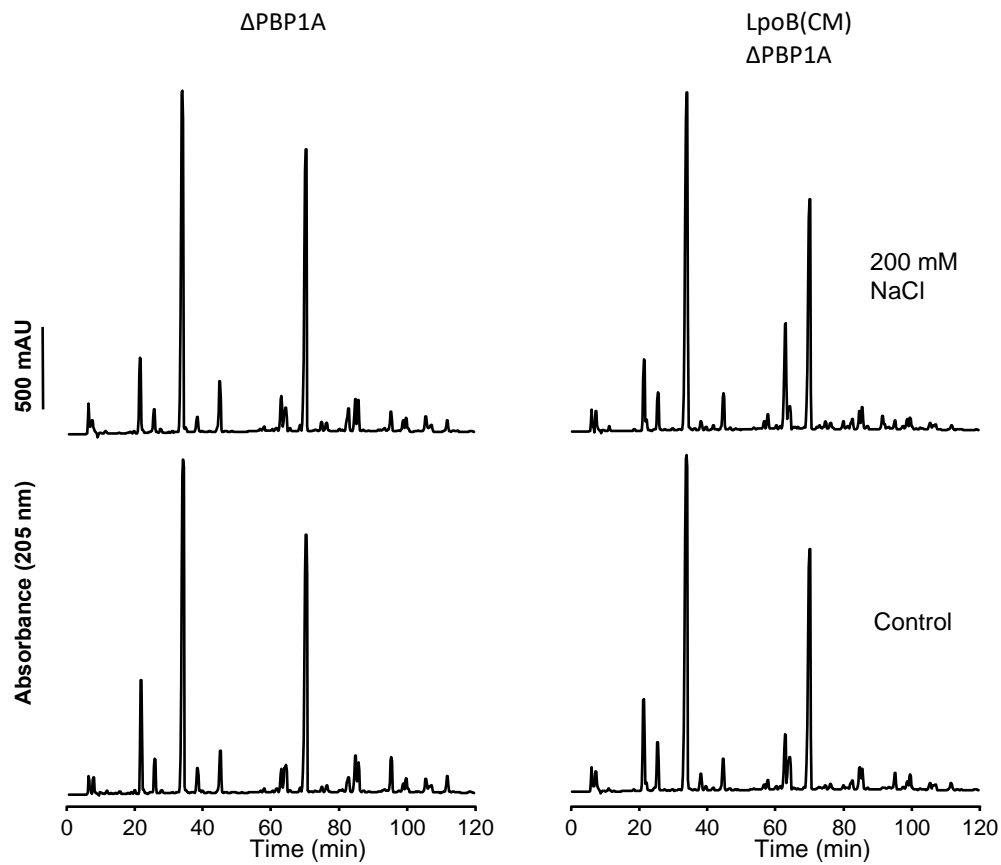

**Figure S1.** PG composition of  $\Delta$ PBP1A and LpoB(CM) $\Delta$ PBP1A cells. Muropeptides prepared from cells grown in LB medium with no salt or supplemented 200 mM NaCl. Muropeptides were analyzed using HPLC. Related to Supplemental Table 1.
